# Supplementary material for: IFIH1 (MDA5) is required for innate immune detection of intron-containing RNA expressed from the HIV-1 provirus
Source: PubMed Central journal article supplement — Proc Natl Acad Sci U S A. 2024 Jul 10;121(29):e2404349121. doi: 10.1073/pnas.2404349121 (PMC11260138; doi:10.1073/pnas.2404349121), 2024-07-10
Supplement: pnas.2404349121.sapp.pdf [file pnas.2404349121.sapp.pdf]

## **Supporting Information for**

IFIH1 (MDA5) is required for innate immune detection of intron-containing RNA expressed from the HIV-1 provirus

Mehmet Hakan Guney, Karthika Nagalekshmi, Sean Matthew McCauley, Claudia Carbone, Ozkan Aydemir, and Jeremy Luban

Corresponding author: Jeremy Luban  
Email: [jeremy.luban@umassmed.edu](mailto:jeremy.luban@umassmed.edu)

### **This PDF file includes:**

Tables S1 to S4

**Table S1. Differentially expressed genes in dendritic cells with luciferase control knockdown: effect of HIV-1-GFP vs minimal HIV-1 vector**

| Gene         | log2FoldChange | p value  | adj p value |
|--------------|----------------|----------|-------------|
| USP41        | 12.73          | 2.78E-05 | 4.36E-04    |
| APOBEC3A     | 10.39          | 6.43E-13 | 6.98E-11    |
| CXCL10       | 10.19          | 2.67E-20 | 1.37E-17    |
| ZBP1         | 10.04          | 1.02E-05 | 1.85E-04    |
| RSAD2        | 9.25           | 4.36E-24 | 6.84E-21    |
| IFI44L       | 8.62           | 6.29E-15 | 1.11E-12    |
| CXCL11       | 8.47           | 4.59E-03 | 3.03E-02    |
| IFITM1       | 8.17           | 1.48E-07 | 4.59E-06    |
| IFI27        | 7.56           | 7.10E-09 | 3.02E-07    |
| IFIT1        | 7.48           | 6.36E-22 | 4.49E-19    |
| ISG20        | 7.47           | 2.17E-11 | 1.71E-09    |
| CCL8         | 7.28           | 7.50E-15 | 1.31E-12    |
| ISG15        | 6.95           | 8.54E-24 | 1.04E-20    |
| NEXN         | 6.94           | 9.50E-08 | 3.12E-06    |
| FAM47E-STBD1 | 6.92           | 1.05E-04 | 1.35E-03    |
| IFITM3       | 6.87           | 1.85E-15 | 3.94E-13    |
| NTNG2        | 6.8            | 3.90E-23 | 4.29E-20    |
| MX1          | 6.77           | 3.39E-16 | 8.12E-14    |
| CMPK2        | 6.53           | 2.42E-14 | 3.87E-12    |
| TNFSF10      | 6.51           | 8.03E-16 | 1.82E-13    |
| HES4         | 6.46           | 2.78E-09 | 1.29E-07    |
| IFIT2        | 6.15           | 5.10E-24 | 6.84E-21    |
| GAREM1       | 5.97           | 2.39E-05 | 3.80E-04    |
| GCH1         | 5.86           | 4.23E-10 | 2.44E-08    |
| APOBEC3D     | 5.84           | 1.54E-04 | 1.88E-03    |
| USP18        | 5.78           | 6.51E-13 | 6.98E-11    |
| APOBEC3B     | 5.78           | 2.41E-04 | 2.73E-03    |
| IFIT3        | 5.71           | 2.55E-21 | 1.71E-18    |
| AXL          | 5.69           | 2.13E-05 | 3.44E-04    |

|                   |      |          |          |
|-------------------|------|----------|----------|
| <b>HSH2D</b>      | 5.67 | 3.07E-10 | 1.87E-08 |
| <b>OASL</b>       | 5.66 | 5.02E-15 | 9.35E-13 |
| <b>GBP4</b>       | 5.6  | 4.75E-07 | 1.27E-05 |
| <b>HAPLN3</b>     | 5.54 | 1.85E-06 | 4.18E-05 |
| <b>HELZ2</b>      | 5.5  | 6.03E-20 | 2.99E-17 |
| <b>HERC5</b>      | 5.48 | 1.99E-16 | 5.14E-14 |
| <b>AC068234.1</b> | 5.28 | 1.04E-03 | 9.29E-03 |
| <b>STAP1</b>      | 5.26 | 1.14E-04 | 1.46E-03 |
| <b>OR52K3P</b>    | 5.26 | 2.66E-08 | 9.79E-07 |
| <b>HESX1</b>      | 5.21 | 1.32E-11 | 1.09E-09 |
| <b>TRIM31</b>     | 5.19 | 1.59E-04 | 1.93E-03 |
| <b>CD38</b>       | 5.07 | 2.19E-17 | 6.66E-15 |
| <b>CCL3L1</b>     | 4.98 | 4.02E-07 | 1.10E-05 |
| <b>IL15RA</b>     | 4.94 | 1.96E-17 | 6.12E-15 |
| <b>MX2</b>        | 4.88 | 1.25E-16 | 3.43E-14 |
| <b>AC068631.3</b> | 4.87 | 2.50E-04 | 2.78E-03 |
| <b>EPST11</b>     | 4.83 | 3.88E-15 | 7.64E-13 |
| <b>DDX58</b>      | 4.55 | 1.76E-16 | 4.70E-14 |
| <b>TMEM52B</b>    | 4.51 | 6.59E-05 | 9.11E-04 |
| <b>DSP</b>        | 4.41 | 5.64E-06 | 1.11E-04 |
| <b>AIM2</b>       | 4.4  | 2.84E-05 | 4.41E-04 |
| <b>IFI44</b>      | 4.39 | 2.07E-13 | 2.47E-11 |
| <b>SIGLEC1</b>    | 4.35 | 8.36E-09 | 3.51E-07 |
| <b>OAS3</b>       | 4.33 | 4.39E-14 | 6.33E-12 |
| <b>BATF2</b>      | 4.32 | 2.48E-12 | 2.36E-10 |
| <b>AC010226.1</b> | 4.28 | 4.63E-04 | 4.70E-03 |
| <b>OTOF</b>       | 4.18 | 3.81E-06 | 7.94E-05 |
| <b>IGFBP4</b>     | 4.16 | 1.23E-09 | 6.17E-08 |
| <b>TLR3</b>       | 4.13 | 6.24E-09 | 2.72E-07 |
| <b>IL27</b>       | 4.07 | 2.44E-07 | 7.25E-06 |
| <b>MFAP5</b>      | 4.07 | 3.69E-06 | 7.73E-05 |
| <b>PLSCR1</b>     | 4.03 | 1.38E-14 | 2.31E-12 |

|                      |      |          |          |
|----------------------|------|----------|----------|
| <b>AL357054.4</b>    | 4    | 7.02E-04 | 6.68E-03 |
| <b>IFI6</b>          | 3.92 | 1.44E-11 | 1.18E-09 |
| <b>CCL7</b>          | 3.9  | 1.29E-09 | 6.44E-08 |
| <b>CD69</b>          | 3.89 | 6.30E-09 | 2.73E-07 |
| <b>SELL</b>          | 3.88 | 9.73E-06 | 1.77E-04 |
| <b>NT5C3A</b>        | 3.85 | 1.54E-12 | 1.54E-10 |
| <b>OAS2</b>          | 3.85 | 2.96E-13 | 3.51E-11 |
| <b>TMEM229B</b>      | 3.81 | 2.73E-08 | 9.96E-07 |
| <b>HERC6</b>         | 3.74 | 2.70E-12 | 2.55E-10 |
| <b>GBP1</b>          | 3.71 | 4.44E-15 | 8.50E-13 |
| <b>NCF1B</b>         | 3.68 | 6.66E-08 | 2.24E-06 |
| <b>IRF7</b>          | 3.66 | 3.05E-14 | 4.65E-12 |
| <b>AC015911.7</b>    | 3.66 | 7.45E-05 | 1.01E-03 |
| <b>IGF2BP3</b>       | 3.65 | 1.45E-05 | 2.49E-04 |
| <b>USP30-AS1</b>     | 3.65 | 4.10E-09 | 1.84E-07 |
| <b>GMPR</b>          | 3.63 | 2.75E-10 | 1.68E-08 |
| <b>SP140</b>         | 3.6  | 1.65E-09 | 7.90E-08 |
| <b>LYSMD2</b>        | 3.6  | 1.35E-09 | 6.65E-08 |
| <b>IL15</b>          | 3.59 | 3.07E-07 | 8.77E-06 |
| <b>IFIH1</b>         | 3.58 | 1.95E-19 | 8.73E-17 |
| <b>DDX60</b>         | 3.58 | 3.12E-12 | 2.90E-10 |
| <b>DDX60L</b>        | 3.54 | 1.18E-10 | 7.89E-09 |
| <b>STIMATE-MUSTN</b> | 3.49 | 4.68E-15 | 8.84E-13 |
| <b>SDS</b>           | 3.45 | 1.09E-05 | 1.94E-04 |
| <b>P2RY6</b>         | 3.44 | 2.16E-04 | 2.51E-03 |
| <b>SAMD9L</b>        | 3.41 | 5.40E-13 | 5.98E-11 |
| <b>STIMATE</b>       | 3.36 | 2.95E-18 | 1.07E-15 |
| <b>CMYA5</b>         | 3.34 | 6.70E-06 | 1.29E-04 |
| <b>ABTB2</b>         | 3.33 | 6.81E-10 | 3.59E-08 |
| <b>SAMD9</b>         | 3.32 | 2.78E-11 | 2.15E-09 |
| <b>SCIN</b>          | 3.29 | 2.91E-03 | 2.12E-02 |
| <b>NAPSB</b>         | 3.28 | 6.78E-10 | 3.59E-08 |

|            |      |          |          |
|------------|------|----------|----------|
| HMCN1      | 3.26 | 2.98E-03 | 2.16E-02 |
| XAF1       | 3.25 | 7.81E-12 | 6.76E-10 |
| EIF2AK2    | 3.24 | 7.43E-14 | 9.69E-12 |
| IFI35      | 3.2  | 5.51E-13 | 6.05E-11 |
| ATP10A     | 3.16 | 1.12E-07 | 3.61E-06 |
| SERPING1   | 3.16 | 2.75E-07 | 8.06E-06 |
| SECTM1     | 3.15 | 3.28E-06 | 7.01E-05 |
| CYP19A1    | 3.14 | 4.88E-03 | 3.18E-02 |
| IFITM2     | 3.12 | 3.13E-10 | 1.88E-08 |
| PARP9      | 3.11 | 6.47E-13 | 6.98E-11 |
| NCF1C      | 3.1  | 1.80E-06 | 4.09E-05 |
| NCF1       | 3.09 | 1.90E-06 | 4.29E-05 |
| RTP4       | 3.09 | 4.52E-14 | 6.44E-12 |
| SP110      | 3.09 | 5.38E-14 | 7.60E-12 |
| TRIM5      | 3.07 | 1.22E-12 | 1.26E-10 |
| MVB12B     | 3.05 | 2.88E-11 | 2.20E-09 |
| SCOC-AS1   | 3.04 | 3.73E-05 | 5.57E-04 |
| IRF1-AS1   | 3    | 8.47E-08 | 2.80E-06 |
| LY6E-DT    | 2.97 | 3.26E-05 | 4.97E-04 |
| PDE4B      | 2.97 | 5.82E-06 | 1.14E-04 |
| HIVEP2     | 2.95 | 1.98E-04 | 2.33E-03 |
| PMAIP1     | 2.94 | 2.15E-07 | 6.43E-06 |
| IDO1       | 2.9  | 7.02E-04 | 6.68E-03 |
| TNF        | 2.9  | 1.32E-06 | 3.15E-05 |
| CDKN2D     | 2.88 | 1.42E-09 | 6.95E-08 |
| AP000873.2 | 2.8  | 1.43E-03 | 1.20E-02 |
| RNF213-AS1 | 2.8  | 9.20E-11 | 6.26E-09 |
| TAP1       | 2.78 | 1.44E-14 | 2.38E-12 |
| AL157394.3 | 2.77 | 1.31E-03 | 1.12E-02 |
| AC084871.4 | 2.76 | 1.55E-05 | 2.62E-04 |
| TRIM22     | 2.74 | 7.00E-20 | 3.35E-17 |
| GPBAR1     | 2.7  | 4.16E-05 | 6.13E-04 |

|                    |      |          |          |
|--------------------|------|----------|----------|
| <b>APOBEC3F</b>    | 2.66 | 1.01E-06 | 2.46E-05 |
| <b>FAM225B</b>     | 2.66 | 1.68E-03 | 1.36E-02 |
| <b>ITIH4</b>       | 2.65 | 1.76E-05 | 2.93E-04 |
| <b>CCL5</b>        | 2.65 | 1.47E-07 | 4.56E-06 |
| <b>FPR2</b>        | 2.64 | 7.98E-06 | 1.50E-04 |
| <b>VAMP5</b>       | 2.64 | 1.51E-09 | 7.36E-08 |
| <b>TOR1B</b>       | 2.63 | 4.05E-35 | 5.43E-31 |
| <b>SMIM2-AS1</b>   | 2.62 | 8.46E-03 | 4.83E-02 |
| <b>STAT1</b>       | 2.6  | 9.51E-13 | 9.88E-11 |
| <b>DHX58</b>       | 2.59 | 1.77E-10 | 1.14E-08 |
| <b>LAMP3</b>       | 2.58 | 5.16E-08 | 1.79E-06 |
| <b>AC119674.2</b>  | 2.58 | 7.95E-03 | 4.61E-02 |
| <b>LILRA5</b>      | 2.57 | 1.19E-07 | 3.81E-06 |
| <b>TESPA1</b>      | 2.57 | 3.89E-03 | 2.68E-02 |
| <b>PPM1K</b>       | 2.57 | 3.64E-14 | 5.36E-12 |
| <b>RABGAP1L</b>    | 2.56 | 2.06E-18 | 7.90E-16 |
| <b>CFB</b>         | 2.55 | 7.62E-06 | 1.45E-04 |
| <b>LGALS2</b>      | 2.54 | 3.77E-04 | 3.94E-03 |
| <b>KITLG</b>       | 2.51 | 7.81E-03 | 4.54E-02 |
| <b>APOBEC3G</b>    | 2.5  | 1.33E-14 | 2.26E-12 |
| <b>AZIN2</b>       | 2.48 | 4.42E-04 | 4.52E-03 |
| <b>AC015911.10</b> | 2.48 | 3.30E-03 | 2.35E-02 |
| <b>CCL2</b>        | 2.48 | 7.55E-16 | 1.74E-13 |
| <b>GBP5</b>        | 2.47 | 3.55E-12 | 3.23E-10 |
| <b>AC004812.2</b>  | 2.46 | 4.23E-05 | 6.22E-04 |
| <b>PLAAT4</b>      | 2.46 | 2.96E-07 | 8.55E-06 |
| <b>MIR3945HG</b>   | 2.45 | 1.34E-04 | 1.67E-03 |
| <b>CYP1B1-AS1</b>  | 2.44 | 8.82E-07 | 2.19E-05 |
| <b>PTGIR</b>       | 2.43 | 2.61E-04 | 2.90E-03 |
| <b>NAMPTP1</b>     | 2.42 | 1.26E-06 | 3.02E-05 |
| <b>SLFN12L</b>     | 2.41 | 2.68E-03 | 1.99E-02 |
| <b>AC006254.1</b>  | 2.4  | 4.87E-04 | 4.91E-03 |

|            |      |          |          |
|------------|------|----------|----------|
| HPSE       | 2.4  | 7.26E-03 | 4.28E-02 |
| BIRC3      | 2.39 | 5.08E-10 | 2.80E-08 |
| AC004988.1 | 2.38 | 4.31E-23 | 4.29E-20 |
| PNPT1      | 2.38 | 4.03E-03 | 2.75E-02 |
| ZNF618     | 2.38 | 2.61E-10 | 1.62E-08 |
| PLEKHN1    | 2.37 | 1.19E-04 | 1.52E-03 |
| PARP10     | 2.36 | 4.61E-10 | 2.58E-08 |
| EPHB2      | 2.35 | 2.94E-19 | 1.27E-16 |
| BST2       | 2.34 | 7.38E-14 | 9.69E-12 |
| OLR1       | 2.33 | 4.92E-08 | 1.72E-06 |
| IRF1       | 2.33 | 7.31E-25 | 1.40E-21 |
| CD1D       | 2.32 | 2.57E-16 | 6.51E-14 |
| H4C14      | 2.31 | 1.34E-07 | 4.22E-06 |
| TRIM69     | 2.3  | 1.47E-10 | 9.57E-09 |
| NLRC5      | 2.29 | 7.84E-08 | 2.60E-06 |
| H4C15      | 2.28 | 4.65E-04 | 4.72E-03 |
| SLFN5      | 2.28 | 1.27E-11 | 1.06E-09 |
| GRIN3A     | 2.27 | 1.10E-05 | 1.97E-04 |
| APOL1      | 2.26 | 2.55E-09 | 1.19E-07 |
| PSMB9      | 2.24 | 1.03E-08 | 4.25E-07 |
| LRG1       | 2.24 | 1.47E-03 | 1.23E-02 |
| PARP14     | 2.24 | 1.17E-08 | 4.77E-07 |
| ANXA2R     | 2.23 | 2.26E-04 | 2.61E-03 |
| MLXIPL     | 2.21 | 1.04E-02 | 5.60E-02 |
| UBE2L6     | 2.21 | 1.27E-13 | 1.60E-11 |
| NAMPT      | 2.21 | 1.79E-16 | 4.70E-14 |
| APOL6      | 2.2  | 6.81E-14 | 9.32E-12 |
| LAP3       | 2.18 | 1.00E-22 | 8.98E-20 |
| ENDOD1     | 2.18 | 6.90E-05 | 9.45E-04 |
| MDK        | 2.18 | 6.33E-12 | 5.65E-10 |
| LGALS3BP   | 2.18 | 3.14E-07 | 8.89E-06 |
| TRIM21     | 2.17 | 8.03E-21 | 5.13E-18 |

|             |      |          |          |
|-------------|------|----------|----------|
| MT2A        | 2.17 | 5.97E-06 | 1.16E-04 |
| CCDC7       | 2.16 | 4.33E-03 | 2.91E-02 |
| AJ009632.2  | 2.16 | 1.04E-03 | 9.31E-03 |
| NMI         | 2.16 | 3.37E-14 | 5.02E-12 |
| TRANK1      | 2.15 | 3.90E-06 | 8.09E-05 |
| AC015911.11 | 2.15 | 2.81E-05 | 4.38E-04 |
| BRIP1       | 2.14 | 7.02E-04 | 6.68E-03 |
| SLC18B1     | 2.14 | 2.25E-06 | 5.02E-05 |
| ZNF442      | 2.13 | 9.53E-03 | 5.26E-02 |
| CSRNP1      | 2.12 | 6.97E-31 | 4.47E-27 |
| LAMA5       | 2.12 | 6.45E-04 | 6.23E-03 |
| BISPR       | 2.12 | 1.12E-17 | 3.72E-15 |
| FXVD6       | 2.11 | 2.96E-05 | 4.58E-04 |
| KIAA1958    | 2.11 | 1.62E-09 | 7.83E-08 |
| AC129507.1  | 2.1  | 7.79E-04 | 7.30E-03 |
| IFIT5       | 2.1  | 3.59E-15 | 7.18E-13 |
| APOL3       | 2.08 | 3.41E-09 | 1.54E-07 |
| FIRRE       | 2.07 | 9.54E-07 | 2.34E-05 |
| RNF213      | 2.07 | 1.63E-08 | 6.35E-07 |
| TLR7        | 2.05 | 6.49E-04 | 6.26E-03 |
| FPGT-TNNI3K | 2.05 | 7.87E-03 | 4.56E-02 |
| LINC01176   | 2.05 | 5.45E-05 | 7.73E-04 |
| PHACTR4     | 2.05 | 2.93E-14 | 4.56E-12 |
| C15orf48    | 2.04 | 3.52E-03 | 2.48E-02 |
| GDF15       | 2.04 | 2.72E-08 | 9.94E-07 |
| H4C8        | 2.03 | 4.10E-04 | 4.23E-03 |
| PML         | 2.03 | 8.15E-18 | 2.80E-15 |
| H2BC20P     | 2.02 | 2.02E-04 | 2.37E-03 |
| HDX         | 2.02 | 1.90E-03 | 1.51E-02 |
| LINC01134   | 2.01 | 4.39E-03 | 2.94E-02 |
| STAT2       | 2.01 | 6.36E-11 | 4.50E-09 |
| ITGB7       | 2    | 1.25E-04 | 1.58E-03 |



|               |      |          |          |
|---------------|------|----------|----------|
| SLC22A4       | 1.99 | 1.98E-05 | 3.25E-04 |
| TAGAP         | 1.99 | 1.33E-09 | 6.59E-08 |
| RUBCN         | 1.99 | 6.42E-09 | 2.76E-07 |
| TPI1P2        | 1.99 | 8.65E-03 | 4.90E-02 |
| RIPOR2        | 1.97 | 7.43E-03 | 4.36E-02 |
| PI4K2B        | 1.96 | 1.93E-06 | 4.34E-05 |
| DTX3L         | 1.96 | 2.53E-18 | 9.44E-16 |
| ACSM5         | 1.96 | 1.27E-22 | 1.06E-19 |
| SLC39A14      | 1.96 | 3.36E-03 | 2.38E-02 |
| TMPRSS13      | 1.95 | 1.21E-06 | 2.91E-05 |
| AEN           | 1.95 | 4.48E-23 | 4.29E-20 |
| TNFRSF10C     | 1.95 | 8.44E-04 | 7.76E-03 |
| SYNJ2BP-COX16 | 1.95 | 9.50E-03 | 5.25E-02 |
| TDRD7         | 1.94 | 1.25E-15 | 2.71E-13 |
| TCF4          | 1.93 | 2.78E-09 | 1.29E-07 |
| ALS2CL        | 1.92 | 3.99E-03 | 2.73E-02 |
| NFKBIZ        | 1.92 | 4.59E-07 | 1.24E-05 |
| HLA-F-AS1     | 1.92 | 5.12E-03 | 3.30E-02 |
| OPTN          | 1.92 | 1.47E-14 | 2.39E-12 |
| CMTR1         | 1.91 | 2.63E-15 | 5.35E-13 |
| EXT1          | 1.9  | 2.15E-04 | 2.50E-03 |
| AL357033.4    | 1.9  | 4.65E-13 | 5.24E-11 |
| SHFL          | 1.9  | 1.47E-12 | 1.48E-10 |
| HLA-F         | 1.9  | 6.29E-08 | 2.12E-06 |
| MASTL         | 1.9  | 1.25E-08 | 5.04E-07 |
| NFIX          | 1.88 | 1.03E-06 | 2.51E-05 |
| SPAG1         | 1.88 | 1.52E-03 | 1.26E-02 |
| H2BC21        | 1.87 | 3.20E-05 | 4.90E-04 |
| SP140L        | 1.87 | 5.21E-13 | 5.82E-11 |
| SLAMF7        | 1.86 | 4.79E-06 | 9.69E-05 |
| AC040162.1    | 1.85 | 1.14E-06 | 2.75E-05 |
| TAP2          | 1.85 | 2.66E-06 | 5.82E-05 |

|            |      |          |          |
|------------|------|----------|----------|
| GRAMD1B    | 1.84 | 4.50E-04 | 4.59E-03 |
| KIAA1671   | 1.84 | 4.58E-03 | 3.03E-02 |
| AL669918.1 | 1.83 | 6.63E-11 | 4.65E-09 |
| SPATS2L    | 1.82 | 1.75E-12 | 1.72E-10 |
| UBE2S      | 1.82 | 1.47E-06 | 3.46E-05 |
| STAG3      | 1.81 | 1.49E-08 | 5.88E-07 |
| CCL3       | 1.81 | 2.52E-11 | 1.97E-09 |
| ENTPD5     | 1.81 | 3.30E-16 | 8.03E-14 |
| CHROMR     | 1.8  | 1.86E-12 | 1.82E-10 |
| CD80       | 1.8  | 6.34E-06 | 1.22E-04 |
| PIWIL4     | 1.8  | 3.85E-07 | 1.06E-05 |
| GVINP1     | 1.78 | 2.57E-06 | 5.67E-05 |
| SHISA5     | 1.78 | 7.29E-19 | 2.96E-16 |
| CNP        | 1.78 | 1.14E-17 | 3.72E-15 |
| AC025423.4 | 1.78 | 3.95E-03 | 2.71E-02 |
| HSD11B1    | 1.77 | 5.19E-05 | 7.48E-04 |
| AL450326.1 | 1.76 | 1.09E-02 | 5.82E-02 |
| TNFSF13B   | 1.76 | 2.22E-15 | 4.58E-13 |
| MYO7B      | 1.75 | 4.22E-03 | 2.85E-02 |
| BLZF1      | 1.75 | 1.66E-11 | 1.33E-09 |
| OAS1       | 1.75 | 2.77E-07 | 8.10E-06 |
| ODF3B      | 1.74 | 2.73E-06 | 5.95E-05 |
| DYNLT1     | 1.74 | 3.24E-14 | 4.88E-12 |
| AC022916.2 | 1.74 | 1.11E-02 | 5.89E-02 |
| ZNF702P    | 1.73 | 1.00E-03 | 8.98E-03 |
| LINC01358  | 1.73 | 5.15E-04 | 5.15E-03 |
| C17orf67   | 1.73 | 7.97E-04 | 7.43E-03 |
| H2AC19     | 1.71 | 5.78E-07 | 1.51E-05 |
| GTPBP1     | 1.71 | 3.31E-09 | 1.51E-07 |
| C1R        | 1.7  | 6.40E-04 | 6.19E-03 |
| AC241585.2 | 1.7  | 1.86E-04 | 2.22E-03 |
| SLC25A28   | 1.7  | 1.04E-09 | 5.27E-08 |

|                   |      |          |          |
|-------------------|------|----------|----------|
| <b>FBXO6</b>      | 1.7  | 1.89E-19 | 8.73E-17 |
| <b>SAT1</b>       | 1.7  | 3.21E-08 | 1.16E-06 |
| <b>PRDM11</b>     | 1.7  | 4.88E-03 | 3.17E-02 |
| <b>PSME2</b>      | 1.69 | 2.66E-14 | 4.20E-12 |
| <b>IL4I1</b>      | 1.68 | 3.94E-04 | 4.10E-03 |
| <b>UBA7</b>       | 1.67 | 3.01E-07 | 8.64E-06 |
| <b>PGAP1</b>      | 1.67 | 5.55E-04 | 5.48E-03 |
| <b>CASZ1</b>      | 1.67 | 4.85E-03 | 3.16E-02 |
| <b>C1GALT1</b>    | 1.67 | 5.87E-14 | 8.19E-12 |
| <b>AP000331.1</b> | 1.67 | 1.78E-03 | 1.42E-02 |
| <b>MACC1</b>      | 1.65 | 3.74E-05 | 5.57E-04 |
| <b>ZMYND15</b>    | 1.64 | 8.92E-10 | 4.57E-08 |
| <b>CCL4</b>       | 1.64 | 7.78E-04 | 7.29E-03 |
| <b>LY6E</b>       | 1.64 | 4.13E-15 | 8.01E-13 |
| <b>KIAA1755</b>   | 1.64 | 1.10E-02 | 5.85E-02 |
| <b>RTCB</b>       | 1.64 | 1.31E-17 | 4.18E-15 |
| <b>JADE2</b>      | 1.63 | 2.17E-10 | 1.38E-08 |
| <b>LRRC32</b>     | 1.63 | 1.58E-04 | 1.92E-03 |
| <b>MYH3</b>       | 1.62 | 7.74E-03 | 4.50E-02 |
| <b>ADAR</b>       | 1.62 | 1.63E-20 | 9.52E-18 |
| <b>IFI16</b>      | 1.62 | 1.54E-07 | 4.73E-06 |
| <b>LRRC1</b>      | 1.61 | 9.10E-04 | 8.27E-03 |
| <b>SPHK1</b>      | 1.61 | 6.43E-09 | 2.76E-07 |
| <b>CARD16</b>     | 1.6  | 9.36E-09 | 3.89E-07 |
| <b>ZNF107</b>     | 1.6  | 7.17E-11 | 5.00E-09 |
| <b>GPR180</b>     | 1.6  | 4.43E-11 | 3.26E-09 |
| <b>RAB37</b>      | 1.6  | 5.76E-05 | 8.09E-04 |
| <b>GBP3</b>       | 1.59 | 3.80E-25 | 8.49E-22 |
| <b>AL645933.5</b> | 1.59 | 4.83E-03 | 3.15E-02 |
| <b>CD274</b>      | 1.59 | 1.68E-30 | 5.62E-27 |
| <b>ADRB2</b>      | 1.59 | 5.64E-03 | 3.54E-02 |
| <b>CGAS</b>       | 1.58 | 8.16E-13 | 8.55E-11 |

|                   |      |          |          |
|-------------------|------|----------|----------|
| <b>CBR1</b>       | 1.57 | 8.21E-14 | 1.06E-11 |
| <b>SCAMP1-AS1</b> | 1.57 | 3.51E-06 | 7.45E-05 |
| <b>RNF19B</b>     | 1.57 | 2.02E-20 | 1.08E-17 |
| <b>LILRB1</b>     | 1.57 | 1.00E-30 | 4.47E-27 |
| <b>C4orf33</b>    | 1.56 | 5.45E-07 | 1.43E-05 |
| <b>PHLDA2</b>     | 1.56 | 3.13E-04 | 3.36E-03 |
| <b>TYMP</b>       | 1.55 | 5.04E-05 | 7.28E-04 |
| <b>FAM122C</b>    | 1.55 | 3.72E-04 | 3.91E-03 |
| <b>AC025171.2</b> | 1.54 | 1.34E-04 | 1.67E-03 |
| <b>AL353807.5</b> | 1.53 | 1.04E-06 | 2.52E-05 |
| <b>CXorf21</b>    | 1.52 | 1.61E-08 | 6.30E-07 |
| <b>TENT5A</b>     | 1.52 | 3.44E-06 | 7.31E-05 |
| <b>AC004241.1</b> | 1.52 | 1.60E-04 | 1.94E-03 |
| <b>PHF11</b>      | 1.52 | 3.86E-10 | 2.24E-08 |
| <b>SLC1A4</b>     | 1.51 | 2.45E-04 | 2.76E-03 |
| <b>AL133367.1</b> | 1.51 | 3.88E-03 | 2.68E-02 |
| <b>TLN2</b>       | 1.51 | 5.49E-05 | 7.77E-04 |
| <b>MYD88</b>      | 1.51 | 7.28E-14 | 9.69E-12 |
| <b>STX11</b>      | 1.5  | 5.78E-29 | 1.55E-25 |
| <b>TRIM25</b>     | 1.5  | 3.66E-17 | 1.05E-14 |
| <b>PIK3CD-AS1</b> | 1.5  | 1.04E-02 | 5.60E-02 |
| <b>NCOA7</b>      | 1.49 | 3.41E-12 | 3.13E-10 |
| <b>ZNFX1</b>      | 1.49 | 4.89E-19 | 2.05E-16 |
| <b>BAHCC1</b>     | 1.49 | 3.50E-05 | 5.30E-04 |
| <b>GIMAP6</b>     | 1.49 | 1.81E-04 | 2.16E-03 |
| <b>RAP2C-AS1</b>  | 1.49 | 5.05E-03 | 3.26E-02 |
| <b>SMAD3</b>      | 1.48 | 5.35E-08 | 1.85E-06 |
| <b>NUB1</b>       | 1.48 | 4.42E-10 | 2.51E-08 |
| <b>AC004241.5</b> | 1.48 | 6.34E-03 | 3.88E-02 |
| <b>DUSP5</b>      | 1.48 | 8.40E-12 | 7.18E-10 |
| <b>SCLT1</b>      | 1.48 | 5.47E-06 | 1.08E-04 |
| <b>IL12RB1</b>    | 1.47 | 1.43E-07 | 4.46E-06 |

|                    |      |          |          |
|--------------------|------|----------|----------|
| <b>TRIM56</b>      | 1.47 | 7.05E-14 | 9.54E-12 |
| <b>SYNE2</b>       | 1.47 | 6.64E-03 | 4.00E-02 |
| <b>BLNK</b>        | 1.47 | 1.53E-05 | 2.59E-04 |
| <b>LILRB4</b>      | 1.47 | 3.05E-12 | 2.86E-10 |
| <b>SUSD3</b>       | 1.47 | 1.70E-03 | 1.38E-02 |
| <b>SSB</b>         | 1.46 | 7.01E-12 | 6.14E-10 |
| <b>TMEM268</b>     | 1.45 | 3.60E-06 | 7.63E-05 |
| <b>STAC3</b>       | 1.45 | 5.19E-15 | 9.54E-13 |
| <b>AGRN</b>        | 1.45 | 9.99E-06 | 1.82E-04 |
| <b>SWT1</b>        | 1.45 | 5.40E-07 | 1.42E-05 |
| <b>CENPN</b>       | 1.44 | 7.94E-04 | 7.41E-03 |
| <b>STARD4</b>      | 1.44 | 5.84E-22 | 4.35E-19 |
| <b>C3AR1</b>       | 1.44 | 2.65E-08 | 9.79E-07 |
| <b>FAM72B</b>      | 1.43 | 2.48E-03 | 1.87E-02 |
| <b>GTF2IP12</b>    | 1.42 | 8.28E-04 | 7.66E-03 |
| <b>ZNF546</b>      | 1.42 | 2.01E-03 | 1.59E-02 |
| <b>KPNA5</b>       | 1.42 | 3.66E-06 | 7.70E-05 |
| <b>PLAAT3</b>      | 1.41 | 8.17E-16 | 1.83E-13 |
| <b>NRIP1</b>       | 1.41 | 2.44E-12 | 2.34E-10 |
| <b>AF127936.1</b>  | 1.4  | 1.16E-03 | 1.02E-02 |
| <b>BTN3A3</b>      | 1.4  | 1.55E-08 | 6.11E-07 |
| <b>ST3GAL5-AS1</b> | 1.4  | 3.43E-03 | 2.42E-02 |
| <b>SAMD4A</b>      | 1.39 | 4.81E-07 | 1.28E-05 |
| <b>CD40</b>        | 1.39 | 6.07E-15 | 1.09E-12 |
| <b>LINC01232</b>   | 1.39 | 7.71E-03 | 4.50E-02 |
| <b>MT1X</b>        | 1.39 | 3.63E-04 | 3.83E-03 |
| <b>SRGAP2C</b>     | 1.38 | 4.93E-09 | 2.18E-07 |
| <b>CALHM6</b>      | 1.38 | 5.39E-03 | 3.43E-02 |
| <b>ANGPTL4</b>     | 1.38 | 2.42E-11 | 1.89E-09 |
| <b>BACE2</b>       | 1.38 | 1.45E-05 | 2.49E-04 |
| <b>PARP12</b>      | 1.38 | 1.14E-15 | 2.50E-13 |
| <b>FUT4</b>        | 1.38 | 1.95E-12 | 1.88E-10 |

|            |      |          |          |
|------------|------|----------|----------|
| FAM225A    | 1.37 | 1.62E-04 | 1.96E-03 |
| RGL1       | 1.37 | 1.08E-11 | 9.03E-10 |
| NAPA       | 1.36 | 6.24E-14 | 8.63E-12 |
| BCL2L13    | 1.36 | 7.76E-18 | 2.74E-15 |
| PANX1      | 1.36 | 1.68E-08 | 6.54E-07 |
| LINC01426  | 1.36 | 6.25E-03 | 3.84E-02 |
| WARS1      | 1.36 | 1.62E-20 | 9.52E-18 |
| SNN        | 1.36 | 4.54E-10 | 2.55E-08 |
| FAM72A     | 1.36 | 9.62E-05 | 1.26E-03 |
| SRGAP2     | 1.35 | 5.28E-10 | 2.87E-08 |
| HCP5       | 1.34 | 2.29E-05 | 3.66E-04 |
| RORA       | 1.34 | 1.09E-02 | 5.82E-02 |
| SKIL       | 1.34 | 2.50E-04 | 2.78E-03 |
| CCDC88C    | 1.33 | 1.49E-03 | 1.23E-02 |
| MRPL40     | 1.33 | 3.85E-09 | 1.73E-07 |
| PCGF5      | 1.32 | 1.97E-11 | 1.57E-09 |
| HYLS1      | 1.32 | 9.81E-03 | 5.37E-02 |
| ASPHD2     | 1.32 | 1.92E-06 | 4.33E-05 |
| RIMKLB     | 1.31 | 7.23E-09 | 3.06E-07 |
| ZFAND4     | 1.31 | 5.47E-03 | 3.47E-02 |
| HSPA1A     | 1.31 | 1.46E-22 | 1.15E-19 |
| FKRP       | 1.31 | 5.81E-06 | 1.14E-04 |
| RBCK1      | 1.31 | 9.19E-11 | 6.26E-09 |
| AC245297.4 | 1.31 | 2.13E-03 | 1.65E-02 |
| BRCA2      | 1.31 | 3.11E-03 | 2.24E-02 |
| F3         | 1.3  | 4.54E-04 | 4.63E-03 |
| HSPA1B     | 1.3  | 7.37E-11 | 5.12E-09 |
| C1S        | 1.3  | 5.08E-03 | 3.28E-02 |
| GIMAP2     | 1.3  | 5.42E-06 | 1.07E-04 |
| CYSLTR1    | 1.3  | 5.69E-06 | 1.12E-04 |
| METTL4     | 1.3  | 3.12E-06 | 6.71E-05 |
| JUP        | 1.3  | 1.68E-04 | 2.03E-03 |

|                    |      |          |          |
|--------------------|------|----------|----------|
| <b>H2BC5</b>       | 1.29 | 1.18E-03 | 1.03E-02 |
| <b>ENPP2</b>       | 1.29 | 4.70E-04 | 4.76E-03 |
| <b>POLR1B</b>      | 1.29 | 1.47E-05 | 2.51E-04 |
| <b>FRG1CP</b>      | 1.29 | 2.16E-07 | 6.45E-06 |
| <b>CASP1</b>       | 1.29 | 7.31E-09 | 3.08E-07 |
| <b>PSMB8</b>       | 1.29 | 3.82E-10 | 2.22E-08 |
| <b>ORAI2</b>       | 1.28 | 3.14E-12 | 2.90E-10 |
| <b>MNDA</b>        | 1.28 | 1.26E-10 | 8.32E-09 |
| <b>ARHGAP27</b>    | 1.27 | 3.52E-07 | 9.82E-06 |
| <b>TTC38</b>       | 1.27 | 1.53E-09 | 7.41E-08 |
| <b>ARMH1</b>       | 1.27 | 1.65E-05 | 2.76E-04 |
| <b>ZC3H12D</b>     | 1.27 | 9.11E-03 | 5.10E-02 |
| <b>JAK3</b>        | 1.27 | 9.86E-04 | 8.87E-03 |
| <b>RAD9A</b>       | 1.27 | 1.16E-06 | 2.78E-05 |
| <b>ZBED1</b>       | 1.26 | 1.49E-10 | 9.67E-09 |
| <b>CAMK1G</b>      | 1.26 | 9.84E-03 | 5.38E-02 |
| <b>RNASEH1-AS1</b> | 1.26 | 7.62E-03 | 4.45E-02 |
| <b>IRAK2</b>       | 1.26 | 1.08E-03 | 9.59E-03 |
| <b>AKAP7</b>       | 1.26 | 1.47E-03 | 1.23E-02 |
| <b>TRIM26</b>      | 1.26 | 4.28E-13 | 4.90E-11 |
| <b>SDSL</b>        | 1.26 | 1.36E-10 | 8.87E-09 |
| <b>LINC01127</b>   | 1.25 | 3.79E-03 | 2.63E-02 |
| <b>NADK</b>        | 1.25 | 5.42E-11 | 3.87E-09 |
| <b>LRRC37A3</b>    | 1.25 | 1.04E-04 | 1.35E-03 |
| <b>HEG1</b>        | 1.25 | 9.97E-09 | 4.13E-07 |
| <b>MTMR11</b>      | 1.24 | 2.84E-04 | 3.10E-03 |
| <b>SLFN12</b>      | 1.24 | 5.28E-06 | 1.05E-04 |
| <b>PARP15</b>      | 1.24 | 1.63E-03 | 1.33E-02 |
| <b>ARHGAP11B</b>   | 1.24 | 5.81E-03 | 3.63E-02 |
| <b>GSTT2B</b>      | 1.24 | 1.08E-02 | 5.79E-02 |
| <b>RASGEF1B</b>    | 1.24 | 4.28E-10 | 2.44E-08 |
| <b>UNC93B1</b>     | 1.24 | 7.68E-10 | 4.04E-08 |

|            |       |          |          |
|------------|-------|----------|----------|
| IRF9       | 1.24  | 4.37E-11 | 3.24E-09 |
| ZC3H12C    | 1.24  | 1.70E-07 | 5.17E-06 |
| MOV10      | 1.22  | 8.73E-11 | 6.00E-09 |
| SLC41A2    | 1.21  | 5.13E-04 | 5.13E-03 |
| RARG       | 1.21  | 2.07E-03 | 1.62E-02 |
| SCO2       | 1.21  | 3.91E-06 | 8.10E-05 |
| AC244197.3 | 1.21  | 4.17E-03 | 2.82E-02 |
| SCARB2     | 1.21  | 1.72E-20 | 9.58E-18 |
| PPA1       | 1.21  | 3.25E-10 | 1.94E-08 |
| SP100      | 1.21  | 5.28E-10 | 2.87E-08 |
| H2AC6      | 1.2   | 4.00E-07 | 1.10E-05 |
| CDC73      | 1.2   | 1.44E-13 | 1.77E-11 |
| CDYL2      | 1.2   | 5.62E-04 | 5.54E-03 |
| SLC25A23   | 1.2   | 8.91E-03 | 5.01E-02 |
| ATF3       | 1.2   | 6.38E-11 | 4.50E-09 |
| STAT4      | 1.19  | 1.60E-04 | 1.94E-03 |
| AF117829.1 | 1.19  | 1.22E-03 | 1.05E-02 |
| CHMP5      | 1.19  | 1.48E-13 | 1.81E-11 |
| GBP2       | 1.19  | 1.33E-08 | 5.34E-07 |
| SIGLEC8    | -1.21 | 1.40E-08 | 5.55E-07 |
| ADAM12     | -1.21 | 7.97E-07 | 2.01E-05 |
| LINC02035  | -1.22 | 3.26E-07 | 9.21E-06 |
| FSCN1      | -1.23 | 8.34E-04 | 7.70E-03 |
| CXCR2      | -1.24 | 2.68E-04 | 2.97E-03 |
| KLF4       | -1.25 | 3.02E-14 | 4.65E-12 |
| SSBP2      | -1.25 | 7.67E-05 | 1.03E-03 |
| FMO5       | -1.26 | 5.51E-03 | 3.49E-02 |
| LINS1      | -1.27 | 1.08E-08 | 4.43E-07 |
| DIXDC1     | -1.27 | 2.28E-04 | 2.61E-03 |
| AC010442.1 | -1.28 | 4.67E-03 | 3.08E-02 |
| NAT8L      | -1.28 | 3.62E-03 | 2.53E-02 |
| DPCD       | -1.3  | 2.20E-04 | 2.54E-03 |



|            |       |          |          |
|------------|-------|----------|----------|
| KANTR      | -1.3  | 9.62E-03 | 5.30E-02 |
| DACT1      | -1.31 | 2.84E-04 | 3.10E-03 |
| CD28       | -1.31 | 2.36E-03 | 1.79E-02 |
| PADI2      | -1.31 | 8.91E-03 | 5.01E-02 |
| YPEL3      | -1.32 | 1.35E-06 | 3.21E-05 |
| WNT5B      | -1.32 | 5.44E-08 | 1.88E-06 |
| EIF4BP6    | -1.33 | 6.30E-03 | 3.86E-02 |
| ORC6       | -1.33 | 3.22E-04 | 3.45E-03 |
| BCL11A     | -1.34 | 2.51E-04 | 2.80E-03 |
| MID1IP1    | -1.36 | 6.85E-17 | 1.91E-14 |
| CENPP      | -1.38 | 3.30E-03 | 2.35E-02 |
| CRB2       | -1.39 | 5.44E-05 | 7.73E-04 |
| ST8SIA6    | -1.39 | 5.30E-06 | 1.05E-04 |
| KRT79      | -1.4  | 3.30E-05 | 5.03E-04 |
| CYGB       | -1.41 | 1.50E-11 | 1.23E-09 |
| AC132812.1 | -1.43 | 4.06E-03 | 2.77E-02 |
| DNAL1      | -1.44 | 3.76E-04 | 3.93E-03 |
| IER3       | -1.45 | 1.20E-08 | 4.86E-07 |
| OBSL1      | -1.46 | 2.14E-03 | 1.66E-02 |
| NFE2       | -1.47 | 1.28E-08 | 5.15E-07 |
| PPBP       | -1.47 | 1.32E-03 | 1.13E-02 |
| AC126474.2 | -1.47 | 3.78E-04 | 3.95E-03 |
| SPACA9     | -1.48 | 1.17E-03 | 1.02E-02 |
| TMEM45B    | -1.48 | 1.48E-06 | 3.48E-05 |
| PCARE      | -1.49 | 8.26E-12 | 7.10E-10 |
| ENHO       | -1.5  | 2.68E-10 | 1.66E-08 |
| LINC02610  | -1.51 | 4.10E-03 | 2.79E-02 |
| PRKAR2B    | -1.51 | 4.19E-04 | 4.30E-03 |
| AC009690.1 | -1.51 | 1.61E-03 | 1.32E-02 |
| STK39      | -1.54 | 6.26E-09 | 2.73E-07 |
| AC124068.1 | -1.57 | 6.92E-07 | 1.77E-05 |
| APBA1      | -1.57 | 5.57E-03 | 3.51E-02 |

|              |       |          |          |
|--------------|-------|----------|----------|
| CXCR1        | -1.58 | 8.76E-07 | 2.17E-05 |
| IL22RA2      | -1.58 | 6.88E-08 | 2.30E-06 |
| PPM1H        | -1.59 | 5.15E-03 | 3.31E-02 |
| IRS2         | -1.6  | 4.40E-13 | 5.00E-11 |
| PDE2A        | -1.62 | 3.62E-04 | 3.82E-03 |
| CHTF18       | -1.64 | 5.95E-03 | 3.70E-02 |
| AC144831.1   | -1.65 | 2.52E-06 | 5.56E-05 |
| CCL28        | -1.65 | 9.98E-05 | 1.30E-03 |
| MFSD6L       | -1.65 | 2.22E-03 | 1.71E-02 |
| SLC25A25-AS1 | -1.66 | 6.05E-03 | 3.74E-02 |
| TDRD9        | -1.68 | 8.10E-04 | 7.54E-03 |
| TCHH         | -1.68 | 6.91E-05 | 9.46E-04 |
| ADGRB2       | -1.7  | 1.04E-02 | 5.60E-02 |
| ADAMTS15     | -1.71 | 1.30E-06 | 3.10E-05 |
| FAM126A      | -1.72 | 1.07E-13 | 1.37E-11 |
| SESN3        | -1.74 | 1.64E-12 | 1.63E-10 |
| ROR1-AS1     | -1.74 | 6.85E-04 | 6.57E-03 |
| ERVFRD-1     | -1.75 | 8.94E-03 | 5.02E-02 |
| ABLIM1       | -1.78 | 1.13E-02 | 6.00E-02 |
| SRGAP1       | -1.79 | 8.04E-03 | 4.65E-02 |
| ANLN         | -1.8  | 1.84E-03 | 1.47E-02 |
| ASF1B        | -1.81 | 7.60E-04 | 7.15E-03 |
| MYORG        | -1.86 | 5.63E-04 | 5.54E-03 |
| AC135048.1   | -1.86 | 2.44E-04 | 2.75E-03 |
| CENPU        | -1.87 | 1.07E-03 | 9.49E-03 |
| CACNB4       | -1.88 | 4.87E-04 | 4.91E-03 |
| RAB33A       | -1.88 | 2.11E-05 | 3.43E-04 |
| GINS4        | -1.92 | 4.80E-08 | 1.68E-06 |
| RIMBP3B      | -1.94 | 4.47E-04 | 4.57E-03 |
| SMAD6        | -1.97 | 8.10E-05 | 1.09E-03 |
| MBOAT2       | -1.97 | 8.50E-04 | 7.80E-03 |
| AC096921.2   | -1.99 | 9.84E-03 | 5.38E-02 |

|                   |       |          |          |
|-------------------|-------|----------|----------|
| <b>KBTBD11</b>    | -2.01 | 2.61E-08 | 9.74E-07 |
| <b>PEG3</b>       | -2.04 | 5.33E-03 | 3.39E-02 |
| <b>SDC1</b>       | -2.05 | 2.08E-04 | 2.43E-03 |
| <b>PRORSD1P</b>   | -2.08 | 2.11E-03 | 1.64E-02 |
| <b>TTC28</b>      | -2.08 | 8.34E-06 | 1.56E-04 |
| <b>E2F1</b>       | -2.1  | 1.12E-04 | 1.44E-03 |
| <b>KPNA2P3</b>    | -2.16 | 3.55E-03 | 2.49E-02 |
| <b>ZNF835</b>     | -2.21 | 4.40E-03 | 2.94E-02 |
| <b>AHNAK2</b>     | -2.23 | 1.08E-05 | 1.93E-04 |
| <b>DUOX1</b>      | -2.25 | 5.28E-06 | 1.05E-04 |
| <b>SLC16A10</b>   | -2.26 | 8.62E-03 | 4.89E-02 |
| <b>MKI67</b>      | -2.27 | 2.87E-05 | 4.46E-04 |
| <b>TFAP4</b>      | -2.28 | 3.45E-04 | 3.66E-03 |
| <b>AC243960.1</b> | -2.39 | 8.10E-03 | 4.67E-02 |
| <b>LINC00921</b>  | -2.44 | 2.02E-03 | 1.59E-02 |
| <b>IGSF3</b>      | -2.5  | 8.91E-10 | 4.57E-08 |
| <b>ZNF571-AS1</b> | -2.52 | 2.38E-03 | 1.80E-02 |
| <b>GASK1A</b>     | -2.53 | 3.11E-05 | 4.78E-04 |
| <b>ADGRG6</b>     | -2.62 | 7.61E-03 | 4.45E-02 |
| <b>CSGALNACT1</b> | -2.65 | 1.19E-03 | 1.04E-02 |
| <b>NPHP1</b>      | -2.69 | 2.22E-03 | 1.71E-02 |
| <b>KIAA1614</b>   | -2.73 | 1.35E-05 | 2.36E-04 |
| <b>TACSTD2</b>    | -2.98 | 1.30E-03 | 1.11E-02 |
| <b>TMEM154</b>    | -3.18 | 8.96E-06 | 1.65E-04 |
| <b>WFDC21P</b>    | -3.19 | 2.99E-04 | 3.23E-03 |
| <b>CCDC80</b>     | -3.3  | 8.99E-03 | 5.04E-02 |
| <b>AP001931.2</b> | -3.84 | 1.57E-03 | 1.29E-02 |
| <b>SLX1B</b>      | -4.66 | 2.22E-05 | 3.57E-04 |
| <b>SLC18A2</b>    | -5.48 | 1.68E-05 | 2.81E-04 |
| <b>AC008878.3</b> | -5.87 | 4.56E-03 | 3.02E-02 |

**Table S2. Differentially expressed genes in dendritic cells with IFIH1 knockdown: effect of HIV-1-GFP vs minimal HIV-1 vector**

| Gene       | log2FoldChange | pvalue   | padj     |
|------------|----------------|----------|----------|
| CXCL10     | 7.11           | 1.26E-07 | 6.93E-05 |
| RSAD2      | 6.79           | 1.21E-13 | 5.08E-10 |
| NTNG2      | 6.31           | 1.28E-10 | 2.30E-07 |
| IFI44L     | 5.34           | 1.05E-06 | 3.40E-04 |
| IFIT1      | 4.41           | 1.45E-08 | 1.23E-05 |
| MX1        | 4.34           | 1.77E-07 | 8.94E-05 |
| ISG15      | 4.27           | 7.69E-10 | 1.08E-06 |
| OASL       | 4.22           | 7.98E-09 | 8.38E-06 |
| ISG20      | 4.13           | 3.33E-04 | 2.22E-02 |
| CMPK2      | 4.12           | 1.59E-06 | 4.56E-04 |
| IFITM3     | 3.95           | 7.64E-06 | 1.51E-03 |
| USP18      | 3.68           | 5.69E-06 | 1.26E-03 |
| IFIT2      | 3.51           | 8.94E-09 | 8.67E-06 |
| LAMA2      | 3.49           | 3.24E-04 | 2.20E-02 |
| IFIT3      | 3.36           | 2.69E-08 | 1.99E-05 |
| HELZ2      | 3.3            | 4.24E-08 | 2.81E-05 |
| RASAL2-AS1 | 3.13           | 6.90E-04 | 3.46E-02 |
| HERC5      | 2.71           | 4.92E-05 | 5.59E-03 |
| IFI44      | 2.69           | 7.32E-06 | 1.47E-03 |
| EPSTI1     | 2.68           | 1.47E-05 | 2.37E-03 |
| TSPOAP1    | 2.66           | 1.06E-04 | 9.51E-03 |
| COL1A1     | 2.65           | 8.29E-04 | 3.91E-02 |
| ALS2CL     | 2.49           | 6.91E-04 | 3.46E-02 |
| IRF7       | 2.42           | 6.41E-07 | 2.18E-04 |
| MX2        | 2.4            | 5.00E-05 | 5.63E-03 |
| BATF2      | 2.39           | 1.52E-04 | 1.27E-02 |
| DDX58      | 2.39           | 1.59E-05 | 2.42E-03 |
| OAS2       | 2.39           | 6.24E-06 | 1.34E-03 |
| OAS3       | 2.35           | 4.50E-05 | 5.30E-03 |

|               |       |          |          |
|---------------|-------|----------|----------|
| RNF144A       | 2.31  | 9.86E-04 | 4.25E-02 |
| SP140         | 2.29  | 1.69E-04 | 1.39E-02 |
| RAB43P1       | 2.25  | 9.91E-06 | 1.79E-03 |
| SLC12A8       | 2.22  | 7.28E-09 | 8.35E-06 |
| FHIT          | 2.18  | 9.24E-04 | 4.08E-02 |
| THAP9         | 2.15  | 3.76E-04 | 2.37E-02 |
| XAF1          | 2.1   | 1.09E-05 | 1.88E-03 |
| CCL5          | 2.08  | 4.71E-04 | 2.75E-02 |
| UXT-AS1       | 2.06  | 8.81E-05 | 8.17E-03 |
| GMPR          | 2.05  | 4.69E-04 | 2.75E-02 |
| OLR1          | 2.05  | 3.78E-07 | 1.49E-04 |
| IFI6          | 2.04  | 4.51E-04 | 2.68E-02 |
| SLC16A1-AS1   | 2.01  | 6.25E-06 | 1.34E-03 |
| GSTM3         | 1.95  | 7.25E-04 | 3.60E-02 |
| APOBEC3F      | 1.95  | 4.30E-04 | 2.63E-02 |
| FCN1          | 1.92  | 8.87E-04 | 4.04E-02 |
| IL15RA        | 1.88  | 9.26E-04 | 4.08E-02 |
| ARMH1         | 1.82  | 2.79E-09 | 3.52E-06 |
| MTMR11        | 1.82  | 1.36E-06 | 4.19E-04 |
| PLSCR1        | 1.82  | 5.50E-04 | 2.95E-02 |
| ABTB2         | 1.81  | 1.12E-03 | 4.50E-02 |
| ANGPTL4       | 1.8   | 4.78E-18 | 3.01E-14 |
| EIF2AK2       | 1.8   | 3.51E-05 | 4.34E-03 |
| DDX60L        | 1.8   | 1.14E-03 | 4.52E-02 |
| ACTL6A        | -1.49 | 7.21E-22 | 9.10E-18 |
| TIMM23B-AGAP6 | -1.56 | 1.01E-03 | 4.29E-02 |
| MSH5-SAPCD1   | -2.08 | 1.32E-03 | 5.06E-02 |
| MBOAT2        | -2.52 | 1.51E-05 | 2.37E-03 |
| GCOM1         | -2.59 | 6.71E-04 | 3.41E-02 |
|               |       |          |          |

| <b>Table S3. Plasmids used in this study</b> |                                                |                                                                                                                                                   |                 |
|----------------------------------------------|------------------------------------------------|---------------------------------------------------------------------------------------------------------------------------------------------------|-----------------|
| <b>Plasmid Name</b>                          | <b>Purpose</b>                                 | <b>Notes</b>                                                                                                                                      | <b>Source</b>   |
| pAIP hGMCSF co                               | expressing human cytokine GM-CSF               | SFFV promoter expresses codon-optimized human GM-CSF and puromycin N-acetyltransferase                                                            | Addgene #74168  |
| pAIP hIL4 co                                 | expressing human cytokine IL4                  | SFFV promoter expresses codon-optimized human IL4 and puromycin N-acetyltransferase                                                               | Addgene #74169  |
| pSIV Δpsi/Δenv/Δvif/Δvpr                     | SIVMAC251 gag-pol/vpx                          | Production of SIV-VLPs containing Vpx protein                                                                                                     | Addgene #132928 |
| pMD2.G                                       | VSV Glycoprotein                               | Pseudotype HIV-1 vectors with VSV Glycoprotein                                                                                                    | Addgene #12259  |
| psPAX2                                       | HIV-1 gag-pol                                  | Encodes gag structural proteins and pol enzymes to generate virion particles to generate 3-part lentiviral vector                                 | Addgene #12260  |
| pUC57mini NL4-3 Δenv eGFP                    | HIV-1 clade B molecular clone                  | Molecular clone of NL4-3 with deletion of 79 nucleotides following the Env signal peptide and eGFP in place of nef. "HIV-1-GFP" in the manuscript | NIH ARP #13906  |
| pPU HSA miR30 L1221                          | rescue lentivector for luciferase (control)    | SFFV promoter expresses puromycin N-acetyltransferase, exogenous HSA protein, and miR30-based shRNA targeting                                     | Addgene #174221 |
|                                              |                                                | Target sequence: 5'-CTTGTCGATGAGAGCGTTTGT A-3'; negative control in knockdown-rescue experiment                                                   |                 |
| pPU HSA miR30 MDA5                           | rescue lentivector for MDA5 knockdown          | SFFV promoter expresses puromycin N-acetyltransferase, exogenous HSA protein, and miR30-based shRNA targeting                                     | Addgene #174222 |
|                                              |                                                | Target sequence: 5'-TTTATACATCATCTTCTCTCGG-3'                                                                                                     |                 |
| pPU huMDA5 miR30 L1221                       | rescue lentivector for huMDA5 expression and   | SFFV promoter expresses puromycin N-acetyltransferase, exogenous huMDA5 protein, and miR30-based shRNA targeting                                  | Addgene #174223 |
|                                              |                                                | Target sequence: 5'-CTTGTCGATGAGAGCGTTTGT A-3'                                                                                                    |                 |
| pPU huMDA5 miR30 MDA5                        | rescue lentivector for huMDA5 expression and   | SFFV promoter expresses puromycin N-acetyltransferase, exogenous huMDA5 protein, and miR30-based shRNA targeting                                  | Addgene #174224 |
|                                              |                                                | Target sequence: 5'-TTTATACATCATCTTCTCTCGG-3'                                                                                                     |                 |
| pscALPspuro MDA5Δ2CARD                       | human MDA5 that lacks 2 CARD domains           | Encodes codon-optimized huMDA5 with a deletion of 2xCARD domains                                                                                  | Addgene #174225 |
| pscALPspuro MDA5-S88D                        | human MDA5 S88D mutant                         | Encodes codon-optimized huMDA5 S88D mutant                                                                                                        | Addgene #174226 |
| pscALPspuro MDA5-S88E                        | human MDA5 S88E mutant                         | Encodes codon-optimized huMDA5 S88E mutant                                                                                                        | Addgene #174227 |
| pscALPspuro Nipah V                          | Lentivector expressing Nipah virus V protein   | Encodes codon-optimized Nipah virus V protein                                                                                                     | Addgene #174228 |
| pAPM miR30 L1221                             | Lentivector for luciferase (control) knockdown | SFFV promoter expresses puromycin N-acetyltransferase and miR30-based shRNA targeting luciferase. Target sequence: 5'-                            | Addgene #115846 |
| pAPM miR30 CAPRIN1-ts1                       | Lentivector for CAPRIN1 knockdown              | SFFV promoter expresses puromycin N-acetyltransferase and miR30-based shRNA targeting CAPRIN1. Target sequence: 5'-                               | Addgene #174229 |
| pAPM miR30 CAPRIN1-ts2                       | Lentivector for CAPRIN1 knockdown              | SFFV promoter expresses puromycin N-acetyltransferase and miR30-based shRNA targeting CAPRIN1. Target sequence: 5'-                               | Addgene #174230 |

|                        |                                   |                                                                                                                     |                 |
|------------------------|-----------------------------------|---------------------------------------------------------------------------------------------------------------------|-----------------|
| pAPM miR30 CAPRIN1-ts3 | Lentivector for CAPRIN1 knockdown | SFFV promoter expresses puromycin N-acetyltransferase and miR30-based shRNA targeting CAPRIN1. Target sequence: 5'- | Addgene #174231 |
| pAPM miR30 DDX1-ts1    | Lentivector for DDX1 knockdown    | SFFV promoter expresses puromycin N-acetyltransferase and miR30-based shRNA targeting DDX1. Target sequence: 5'-    | Addgene #174232 |
| pAPM miR30 DDX1-ts2    | Lentivector for DDX1 knockdown    | SFFV promoter expresses puromycin N-acetyltransferase and miR30-based shRNA targeting DDX1. Target sequence: 5'-    | Addgene #174233 |
| pAPM miR30 DDX1-ts3    | Lentivector for DDX1 knockdown    | SFFV promoter expresses puromycin N-acetyltransferase and miR30-based shRNA targeting DDX1. Target sequence: 5'-    | Addgene #174234 |
| pAPM miR30 DDX3X-ts1   | Lentivector for DDX3X knockdown   | SFFV promoter expresses puromycin N-acetyltransferase and miR30-based shRNA targeting DDX3X. Target sequence: 5'-   | Addgene #174235 |
| pAPM miR30 DDX3X-ts2   | Lentivector for DDX3X knockdown   | SFFV promoter expresses puromycin N-acetyltransferase and miR30-based shRNA targeting DDX3X. Target sequence: 5'-   | Addgene #174236 |
| pAPM miR30 DDX3X-ts3   | Lentivector for DDX3X knockdown   | SFFV promoter expresses puromycin N-acetyltransferase and miR30-based shRNA targeting DDX3X. Target sequence: 5'-   | Addgene #174237 |
| pAPM miR30 DDX17-ts1   | Lentivector for DDX17 knockdown   | SFFV promoter expresses puromycin N-acetyltransferase and miR30-based shRNA targeting DDX17. Target sequence: 5'-   | Addgene #174238 |
| pAPM miR30 DDX17-ts2   | Lentivector for DDX17 knockdown   | SFFV promoter expresses puromycin N-acetyltransferase and miR30-based shRNA targeting DDX17. Target sequence: 5'-   | Addgene #174239 |
| pAPM miR30 DDX17-ts3   | Lentivector for DDX17 knockdown   | SFFV promoter expresses puromycin N-acetyltransferase and miR30-based shRNA targeting DDX17. Target sequence: 5'-   | Addgene #174240 |
| pAPM miR30 DDX58-ts1   | Lentivector for DDX58 knockdown   | SFFV promoter expresses puromycin N-acetyltransferase and miR30-based shRNA targeting DDX58. Target sequence: 5'-   | Addgene #174241 |
| pAPM miR30 DDX58-ts2   | Lentivector for DDX58 knockdown   | SFFV promoter expresses puromycin N-acetyltransferase and miR30-based shRNA targeting DDX58. Target sequence: 5'-   | Addgene #174242 |
| pAPM miR30 DDX58-ts3   | Lentivector for DDX58 knockdown   | SFFV promoter expresses puromycin N-acetyltransferase and miR30-based shRNA targeting DDX58. Target sequence: 5'-   | Addgene #174243 |
| pAPM miR30 DHX58-ts1   | Lentivector for DHX58 knockdown   | SFFV promoter expresses puromycin N-acetyltransferase and miR30-based shRNA targeting DHX58. Target sequence: 5'-   | Addgene #174244 |
| pAPM miR30 DHX58-ts2   | Lentivector for DHX58 knockdown   | SFFV promoter expresses puromycin N-acetyltransferase and miR30-based shRNA targeting DHX58. Target sequence: 5'-   | Addgene #174245 |
| pAPM miR30 DHX58-ts3   | Lentivector for DHX58 knockdown   | SFFV promoter expresses puromycin N-acetyltransferase and miR30-based shRNA targeting DHX58. Target sequence: 5'-   | Addgene #174246 |
| pAPM miR30 EIF2AK2-ts1 | Lentivector for EIF2AK2 knockdown | SFFV promoter expresses puromycin N-acetyltransferase and miR30-based shRNA targeting EIF2AK2. Target sequence: 5'- | Addgene #174247 |
| pAPM miR30 EIF2AK2-ts2 | Lentivector for EIF2AK2 knockdown | SFFV promoter expresses puromycin N-acetyltransferase and miR30-based shRNA targeting EIF2AK2. Target sequence: 5'- | Addgene #174248 |
| pAPM miR30 EIF2AK2-ts3 | Lentivector for EIF2AK2 knockdown | SFFV promoter expresses puromycin N-acetyltransferase and miR30-based shRNA targeting EIF2AK2. Target sequence: 5'- | Addgene #174249 |
| pAPM miR30 HNRNPK-ts1  | Lentivector for HNRNPK knockdown  | SFFV promoter expresses puromycin N-acetyltransferase and miR30-based shRNA targeting HNRNPK. Target sequence: 5'-  | Addgene #174250 |
| pAPM miR30 HNRNPK-ts2  | Lentivector for HNRNPK knockdown  | SFFV promoter expresses puromycin N-acetyltransferase and miR30-based shRNA targeting HNRNPK. Target sequence: 5'-  | Addgene #174251 |
| pAPM miR30 HNRNPK-ts3  | Lentivector for HNRNPK knockdown  | SFFV promoter expresses puromycin N-acetyltransferase and miR30-based shRNA targeting HNRNPK. Target sequence: 5'-  | Addgene #174252 |
| pAPM miR30 HNRNPR-ts1  | Lentivector for HNRNPR knockdown  | SFFV promoter expresses puromycin N-acetyltransferase and miR30-based shRNA targeting HNRNPR. Target sequence: 5'-  | Addgene #174253 |

|                       |                                  |                                                                                                                    |                 |
|-----------------------|----------------------------------|--------------------------------------------------------------------------------------------------------------------|-----------------|
| pAPM miR30 HNRNPR-ts2 | Lentivector for HNRNPR knockdown | SFFV promoter expresses puromycin N-acetyltransferase and miR30-based shRNA targeting HNRNPR. Target sequence: 5'- | Addgene #174254 |
| pAPM miR30 HNRNPR-ts3 | Lentivector for HNRNPR knockdown | SFFV promoter expresses puromycin N-acetyltransferase and miR30-based shRNA targeting HNRNPR. Target sequence: 5'- | Addgene #174255 |
| pAPM miR30 IFI16-ts1  | Lentivector for IFI16 knockdown  | SFFV promoter expresses puromycin N-acetyltransferase and miR30-based shRNA targeting IFI16. Target sequence: 5'-  | Addgene #174256 |
| pAPM miR30 IFI16-ts2  | Lentivector for IFI16 knockdown  | SFFV promoter expresses puromycin N-acetyltransferase and miR30-based shRNA targeting IFI16. Target sequence: 5'-  | Addgene #174257 |
| pAPM miR30 IFI16-ts3  | Lentivector for IFI16 knockdown  | SFFV promoter expresses puromycin N-acetyltransferase and miR30-based shRNA targeting IFI16. Target sequence: 5'-  | Addgene #174258 |
| pAPM miR30 IFIH1-ts1  | Lentivector for IFIH1 knockdown  | SFFV promoter expresses puromycin N-acetyltransferase and miR30-based shRNA targeting IFIH1. Target sequence: 5'-  | Addgene #174259 |
| pAPM miR30 IFIH1-ts2  | Lentivector for IFIH1 knockdown  | SFFV promoter expresses puromycin N-acetyltransferase and miR30-based shRNA targeting IFIH1. Target sequence: 5'-  | Addgene #174260 |
| pAPM miR30 IFIH1-ts3  | Lentivector for IFIH1 knockdown  | SFFV promoter expresses puromycin N-acetyltransferase and miR30-based shRNA targeting IFIH1. Target sequence: 5'-  | Addgene #174261 |
| pAPM miR30 ILF2-ts1   | Lentivector for ILF2 knockdown   | SFFV promoter expresses puromycin N-acetyltransferase and miR30-based shRNA targeting ILF2. Target sequence: 5'-   | Addgene #174262 |
| pAPM miR30 ILF2-ts2   | Lentivector for ILF2 knockdown   | SFFV promoter expresses puromycin N-acetyltransferase and miR30-based shRNA targeting ILF2. Target sequence: 5'-   | Addgene #174263 |
| pAPM miR30 ILF2-ts3   | Lentivector for ILF2 knockdown   | SFFV promoter expresses puromycin N-acetyltransferase and miR30-based shRNA targeting ILF2. Target sequence: 5'-   | Addgene #174264 |
| pAPM miR30 ILF3-ts1   | Lentivector for ILF3 knockdown   | SFFV promoter expresses puromycin N-acetyltransferase and miR30-based shRNA targeting ILF3. Target sequence: 5'-   | Addgene #174265 |
| pAPM miR30 ILF3-ts2   | Lentivector for ILF3 knockdown   | SFFV promoter expresses puromycin N-acetyltransferase and miR30-based shRNA targeting ILF3. Target sequence: 5'-   | Addgene #174266 |
| pAPM miR30 ILF3-ts3   | Lentivector for ILF3 knockdown   | SFFV promoter expresses puromycin N-acetyltransferase and miR30-based shRNA targeting ILF3. Target sequence: 5'-   | Addgene #174267 |
| pAPM miR30 LRPPRC-ts1 | Lentivector for LRPPRC knockdown | SFFV promoter expresses puromycin N-acetyltransferase and miR30-based shRNA targeting LRPPRC. Target sequence: 5'- | Addgene #174268 |
| pAPM miR30 LRPPRC-ts2 | Lentivector for LRPPRC knockdown | SFFV promoter expresses puromycin N-acetyltransferase and miR30-based shRNA targeting LRPPRC. Target sequence: 5'- | Addgene #174269 |
| pAPM miR30 LRPPRC-ts3 | Lentivector for LRPPRC knockdown | SFFV promoter expresses puromycin N-acetyltransferase and miR30-based shRNA targeting LRPPRC. Target sequence: 5'- | Addgene #174270 |
| pAPM miR30 MATR3-ts1  | Lentivector for MATR3 knockdown  | SFFV promoter expresses puromycin N-acetyltransferase and miR30-based shRNA targeting MATR3. Target sequence: 5'-  | Addgene #174271 |
| pAPM miR30 MATR3-ts2  | Lentivector for MATR3 knockdown  | SFFV promoter expresses puromycin N-acetyltransferase and miR30-based shRNA targeting MATR3. Target sequence: 5'-  | Addgene #174272 |
| pAPM miR30 MATR3-ts3  | Lentivector for MATR3 knockdown  | SFFV promoter expresses puromycin N-acetyltransferase and miR30-based shRNA targeting MATR3. Target sequence: 5'-  | Addgene #174273 |
| pAPM miR30 MAVS-ts1   | Lentivector for MAVS knockdown   | SFFV promoter expresses puromycin N-acetyltransferase and miR30-based shRNA targeting MAVS. Target sequence: 5'-   | Addgene #174274 |
| pAPM miR30 MAVS-ts2   | Lentivector for MAVS knockdown   | SFFV promoter expresses puromycin N-acetyltransferase and miR30-based shRNA targeting MAVS. Target sequence: 5'-   | Addgene #174275 |
| pAPM miR30 MAVS-ts3   | Lentivector for MAVS knockdown   | SFFV promoter expresses puromycin N-acetyltransferase and miR30-based shRNA targeting MAVS. Target sequence: 5'-   | Addgene #174276 |



|                        |                                   |                                                                                                                                            |                 |
|------------------------|-----------------------------------|--------------------------------------------------------------------------------------------------------------------------------------------|-----------------|
| pAPM miR30 MOV10-ts1   | Lentivector for MOV10 knockdown   | SFFV promoter expresses puromycin N-acetyltransferase and miR30-based shRNA targeting MOV10. Target sequence: 5'-                          | Addgene #174277 |
| pAPM miR30 MOV10-ts2   | Lentivector for MOV10 knockdown   | SFFV promoter expresses puromycin N-acetyltransferase and miR30-based shRNA targeting MOV10. Target sequence: 5'-                          | Addgene #174278 |
| pAPM miR30 MOV10-ts3   | Lentivector for MOV10 knockdown   | SFFV promoter expresses puromycin N-acetyltransferase and miR30-based shRNA targeting MOV10. Target sequence: 5'-                          | Addgene #174279 |
| pAPM miR30 MYD88-ts1   | Lentivector for MYD88 knockdown   | SFFV promoter expresses puromycin N-acetyltransferase and miR30-based shRNA targeting MYD88. Target sequence: 5'-                          | Addgene #174280 |
| pAPM miR30 MYD88-ts2   | Lentivector for MYD88 knockdown   | SFFV promoter expresses puromycin N-acetyltransferase and miR30-based shRNA targeting MYD88. Target sequence: 5'-                          | Addgene #174281 |
| pAPM miR30 MYD88-ts3   | Lentivector for MYD88 knockdown   | SFFV promoter expresses puromycin N-acetyltransferase and miR30-based shRNA targeting MYD88. Target sequence: 5'-                          | Addgene #174282 |
| pAPM miR30 TMEM173-ts1 | Lentivector for TMEM173 knockdown | SFFV promoter expresses puromycin N-acetyltransferase and miR30-based shRNA targeting TMEM173. Target sequence: 5'-                        | Addgene #174283 |
| pAPM miR30 TMEM173-ts2 | Lentivector for TMEM173 knockdown | SFFV promoter expresses puromycin N-acetyltransferase and miR30-based shRNA targeting TMEM173. Target sequence: 5'-                        | Addgene #174284 |
| pAPM miR30 TMEM173-ts3 | Lentivector for TMEM173 knockdown | SFFV promoter expresses puromycin N-acetyltransferase and miR30-based shRNA targeting TMEM173. Target sequence: 5'-                        | Addgene #174285 |
| pAPM miR30 XPO1-ts1    | Lentivector for XPO1 knockdown    | SFFV promoter expresses puromycin N-acetyltransferase and miR30-based shRNA targeting XPO1. Target sequence: 5'-TTCTGTATCTACATAATCCAGA-3'  | Addgene #174286 |
| pAPM miR30 XPO1-ts2    | Lentivector for XPO1 knockdown    | SFFV promoter expresses puromycin N-acetyltransferase and miR30-based shRNA targeting XPO1. Target sequence: 5'-TATAAGTTGATCATGTTCCCTTA-3' | Addgene #174287 |
| pAPM miR30 XPO1-ts3    | Lentivector for XPO1 knockdown    | SFFV promoter expresses puromycin N-acetyltransferase and miR30-based shRNA targeting XPO1. Target sequence: 5'-TAACAGTAACAAGAAATCGTTT-3'  | Addgene #174288 |
| pAPM miR30 ZC3HAV1-ts1 | Lentivector for ZC3HAV1 knockdown | SFFV promoter expresses puromycin N-acetyltransferase and miR30-based shRNA targeting ZC3HAV1. Target sequence: 5'-                        | Addgene #174289 |
| pAPM miR30 ZC3HAV1-ts2 | Lentivector for ZC3HAV1 knockdown | SFFV promoter expresses puromycin N-acetyltransferase and miR30-based shRNA targeting ZC3HAV1. Target sequence: 5'-                        | Addgene #174290 |
| pAPM miR30 ZC3HAV1-ts3 | Lentivector for ZC3HAV1 knockdown | SFFV promoter expresses puromycin N-acetyltransferase and miR30-based shRNA targeting ZC3HAV1. Target sequence: 5'-                        | Addgene #174291 |

**Table S4. Oligonucleotides used in RT-qPCR of HIV-1 following formaldehyde cross-linking immunoprecipitation (fCLIP)**

| <b>Name</b> | <b>Sequence</b>                |
|-------------|--------------------------------|
| 5'LTR-F     | 5'-TGTTCTGGGCGCCACTGCTAGAGA-3' |
| 5'LTR-R     | 5'-GGAACCCACTGCTTAAGCCTCAA-3'  |
| gag-F       | 5'-ACATCAAGCAGCCATGCAAAT-3'    |
| gag-R       | 5'-TCTGGCCTGGTGCAATAGG-3'      |
| RT-F        | 5'-AGAAATACAGAAGCAGGGGCA-3'    |
| RT-R        | 5'-TGGGCACCCTTCATTCTTGC-3'     |
| IN-F        | 5'-TGGAGAGCAATGGCTAGTGA-3'     |
| IN-R        | 5'-GCATGGCTTCCCCTTTTAGC-3'     |
| D1A4-F      | 5'-GATCTCTCGACGCAGGACTC-3'     |
| D1A4-R      | 5'-TGGTCCTTTCCAAACTGGAT-3'     |
| D4A7-F      | 5'-CAGGAAGAAGCGGAGACAG-3'      |
| D4A7-R      | 5'-ATTGGGAGGTGGGTCTGAAAC-3'    |
| ACTB-F      | 5'-GTGATGGTGGGCATGGGTC-3'      |
| ACTB-R      | 5'-CCATGTCGTCCCAGTTGGTG-3'     |
